# Supplementary material for: A computational study of hedgehog signalling involved in basal cell carcinoma reveals the potential and limitation of combination therapy
Source: Springer Nature journal article supplement (doi:10.1186/s12885-018-4451-1), 2018-05-18
Supplement: MOESM1 [file 15774914]

# A Computational Study of Hedgehog Signalling Involved in Basal Cell Carcinoma Reveals the Potential and Limitation of Combination Therapy

Antoine Buetti-Dinh <sup>1,2,3,4,5</sup>, Rebecca Jensen <sup>1</sup>, and Ran Friedman <sup>1,2</sup>

<sup>1</sup>Department of Chemistry and Biomedical Sciences, Linnæus University,  
Kalmar, Sweden [antoine.buetti@lnu.se](mailto:antoine.buetti@lnu.se)

<sup>2</sup>Linnæus University Centre for Biomaterials Chemistry, Linnæus University,  
Kalmar, Sweden [ran.friedman@lnu.se](mailto:ran.friedman@lnu.se)

<sup>3</sup>Centre for Ecology and Evolution in Microbial Model Systems, Linnaeus  
University, Sweden

<sup>4</sup>Institute of Computational Science, Faculty of Informatics, Università della  
Svizzera Italiana, Lugano, Switzerland

<sup>5</sup>Swiss Institute of Bioinformatics, Lausanne, Switzerland

## **SUPPLEMENTARY MATERIAL**

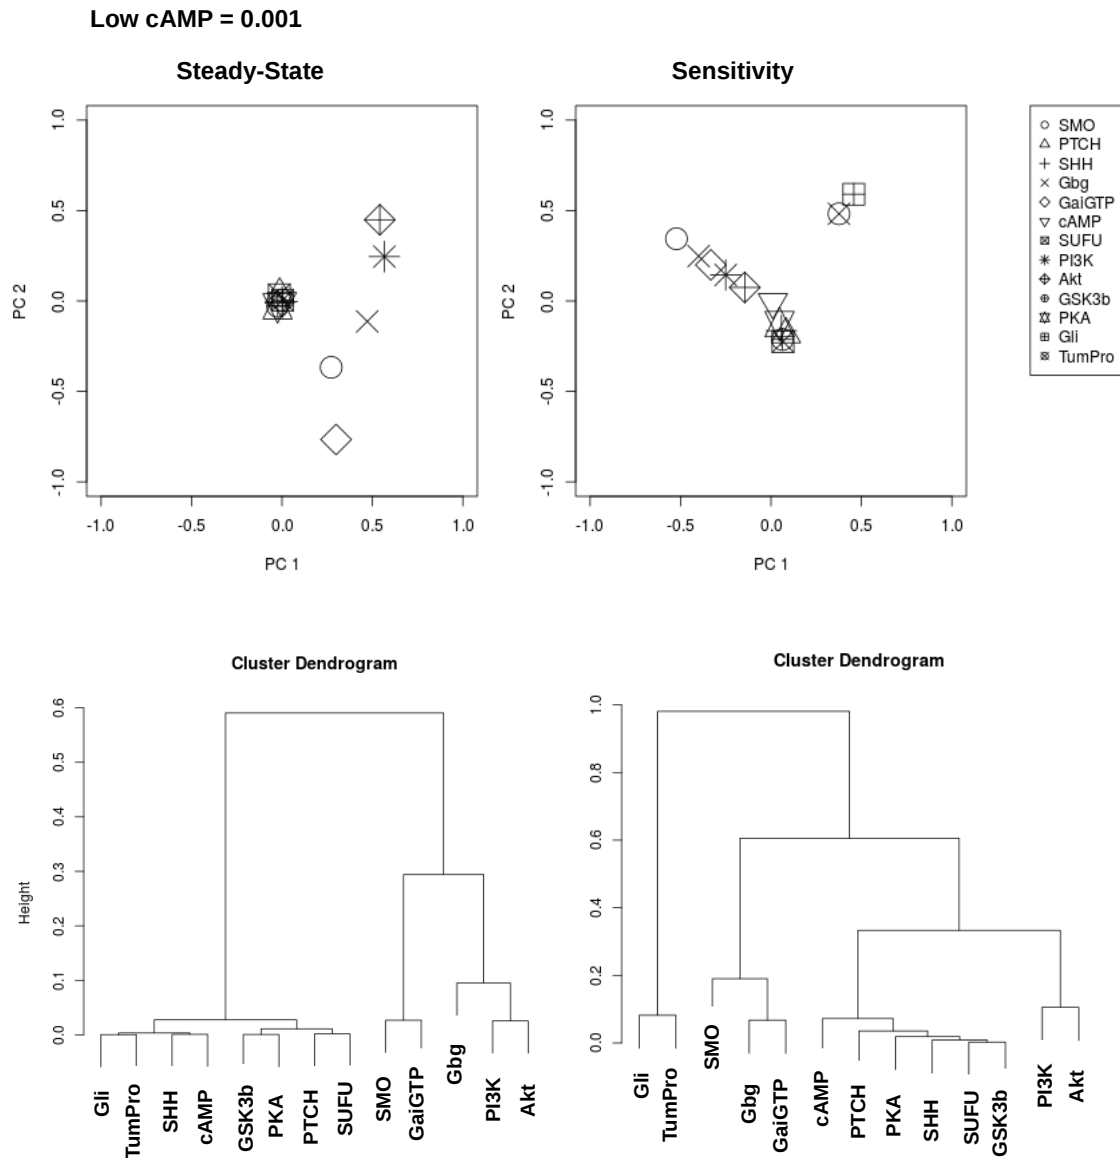

Supplementary Figure S1: **PCA at low levels of cAMP (no PDEs inhibition)**. Steady-state (left) and sensitivity (right) PCA of the network control analysis dataset presented in section “Signalling pathway analysis identified PI3K/Akt and PDEs as potential targets for treatment of BCC” at low cAMP. Hierarchical clustering dendrograms (bottom panels) on the PCA loadings (upper panels).

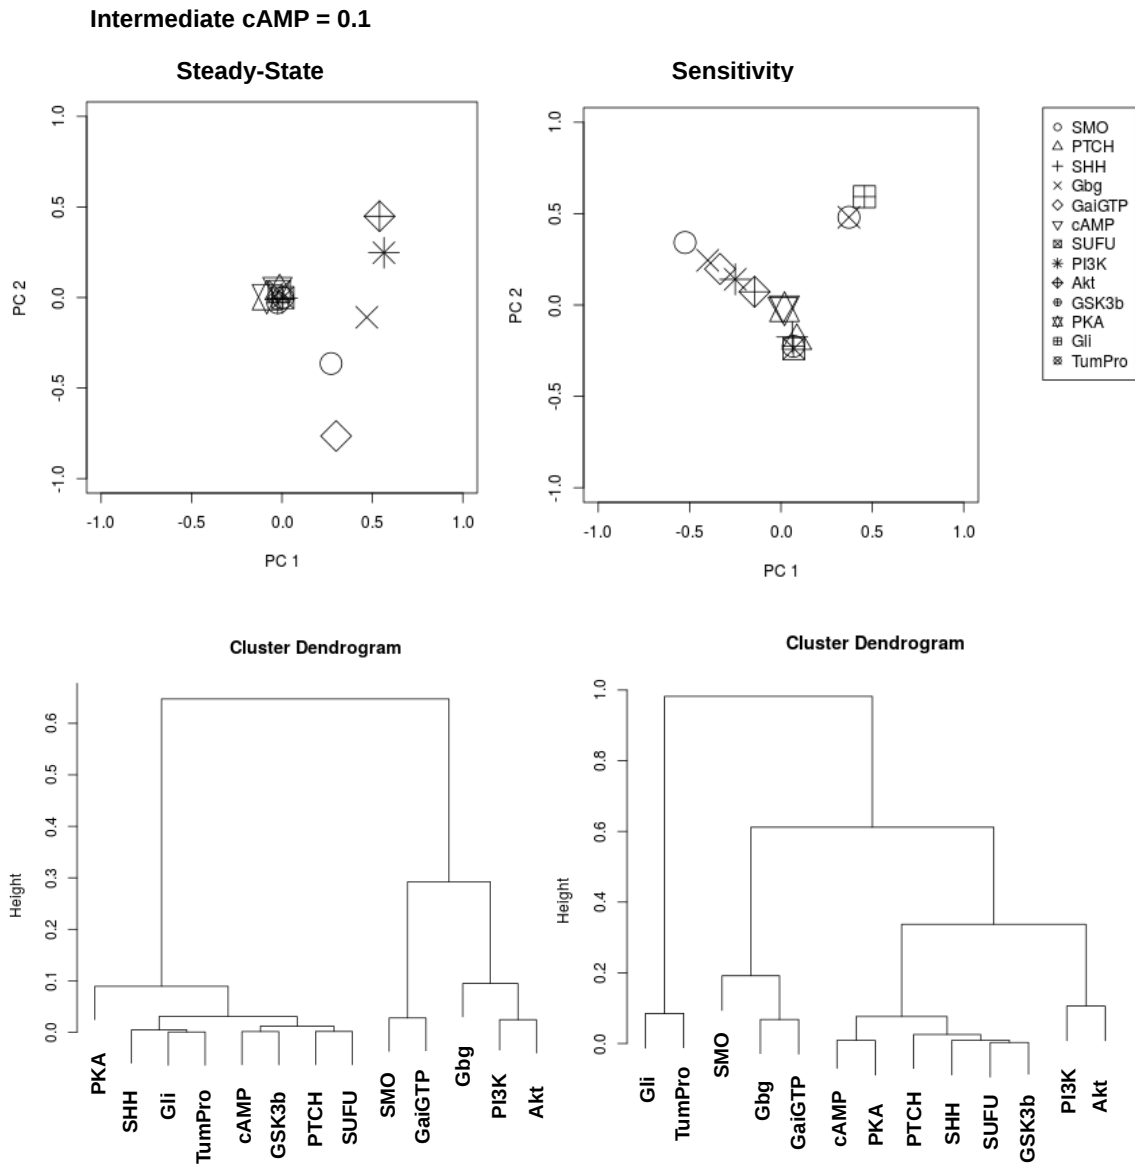

Supplementary Figure S2: **PCA at intermediate levels of cAMP (mild PDEs inhibition).** Steady-state (left) and sensitivity (right) PCA of the network control analysis dataset presented in section “Signalling pathway analysis identified PI3K/Akt and PDEs as potential targets for treatment of BCC” at intermediate cAMP. Hierarchical clustering dendrograms (bottom panels) on the PCA loadings (upper panels).

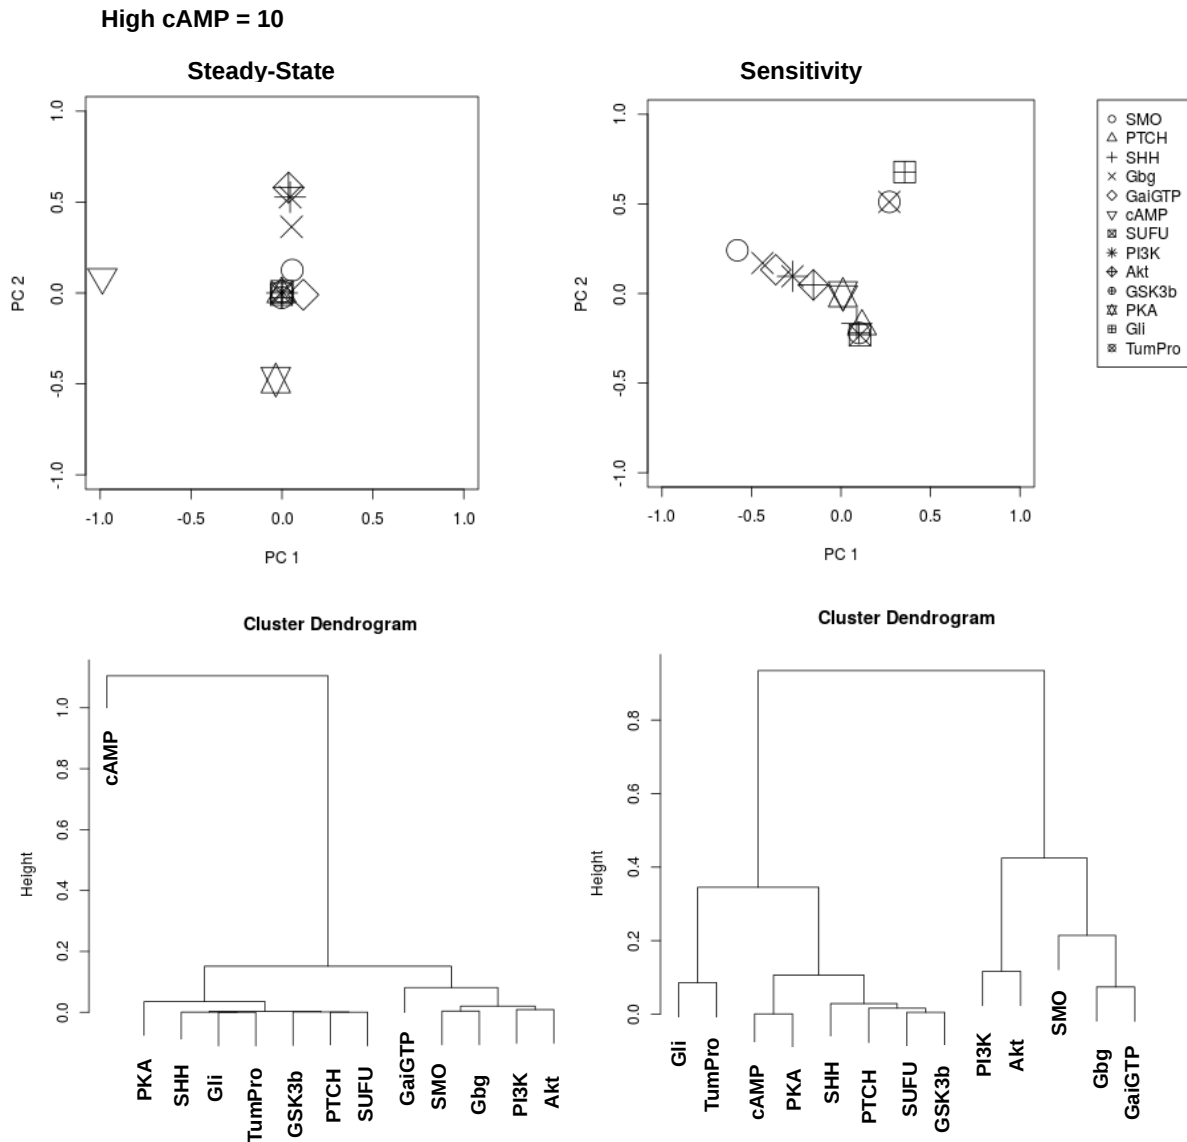

Supplementary Figure S3: **PCA at high levels of cAMP (strong PDEs inhibition)**. Steady-state (left) and sensitivity (right) PCA of the network control analysis dataset presented in section “Signalling pathway analysis identified PI3K/Akt and PDEs as potential targets for treatment of BCC” at high cAMP. Hierarchical clustering dendrograms (bottom panels) on the PCA loadings (upper panels).

| Parameter Name  | Signalling Pathway Analysis* | Network Control Analysis* |
|-----------------|------------------------------|---------------------------|
| $\beta(SMO)$    | $10^{-3} - 10^{-1}(100)$     | $10^{-4} - 10^{+1}(1.2)$  |
| $\beta(PTCH)$   | $10^{-3} - 10^{-1}(100)$     | $10^{-3}$                 |
| $\beta(SHH)$    | $10^{-3} - 10^{-1}(100)$     | $10^{-3}$                 |
| $\beta(Gbg)$    | $10^{-3} - 10^{-1}(100)$     | $10^{-3}$                 |
| $\beta(GaiGTP)$ | $10^{-3} - 10^{-1}(100)$     | $10^{-3}$                 |
| $\beta(cAMP)$   | $10^{-3} - 10^{-1}(100)$     | $10^{-3}$                 |
| $\beta(SUFU)$   | $10^{-3} - 10^{-1}(100)$     | $10^{-3}$                 |
| $\beta(PI3K)$   | $10^{-3} - 10^{-1}(100)$     | $10^{-4} - 10^{+1}(1.2)$  |
| $\beta(Akt)$    | $10^{-3} - 10^{-1}(100)$     | $10^{-3}$                 |
| $\beta(GSK3b)$  | $10^{-3} - 10^{-1}(100)$     | $10^{-3}$                 |
| $\beta(PKA)$    | $10^{-3} - 10^{-1}(100)$     | $10^{-3}$                 |
| $\beta(Gli)$    | $10^{-3} - 10^{-1}(100)$     | $10^{-3}$                 |
| $\beta(TumPro)$ | $10^{-3} - 10^{-3}(1)$       | $10^{-3}$                 |

Supplementary Table 1: **Model parametrization.** Activity units are arbitrary and in the context of signalling proteins roughly translate to the order of  $1\mu\text{M}^1$ . Values for the network end-points can only be appreciated by comparison.

## References

- [1] R. Milo, P. Jorgensen, U. Moran, G. Weber, and M. Springer. BioNumbers—the database of key numbers in molecular and cell biology. *Nucleic Acids Res.*, 38(Database issue):D750–753, Jan 2010. [PubMed Central:PMC2808940] [DOI:10.1093/nar/gkp889] [PubMed:19854939].
